# Supplementary material
Source: publisher site journal article supplement (http://www.spandidos-publications.com/6040/downloadSupplementary)

Figure S1. Cytotoxicity of free bortezomib in monolayer T98G and U87 human glioblastoma cell lines evaluated by MTT test after 24 and 72 h of incubation. Calculated  $IC_{50}$  was  $20.3 \pm 1.3$  nM. \* $P < 0.05$  and \*\* $P < 0.01$  by Student's t-test.

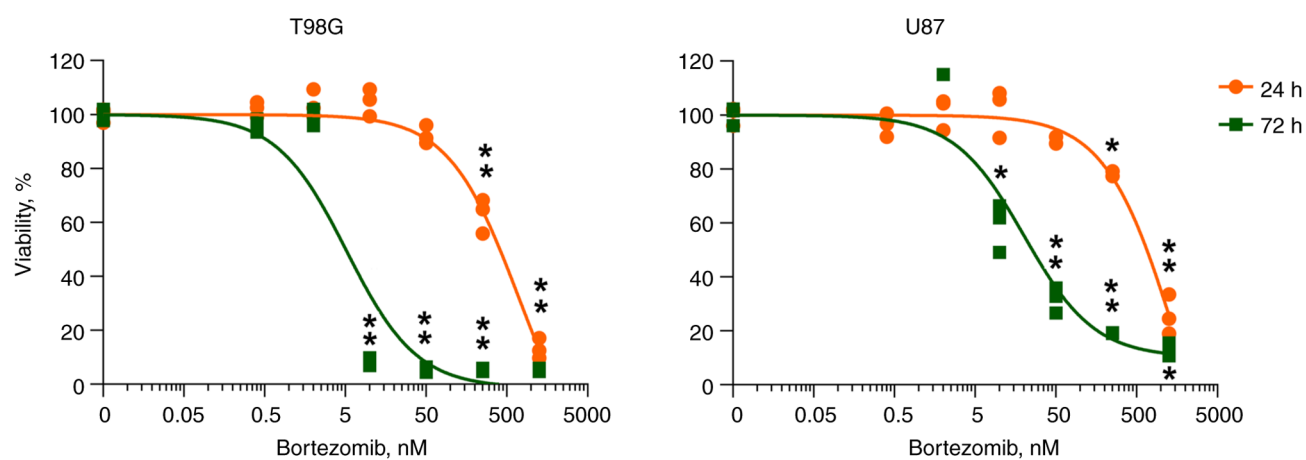

Figure S2. Cytotoxicity of amphiphilic PVP polymer in monolayer T98G and U87 human glioblastoma cell lines evaluated by MTT test after 72 h of incubation. PVP, poly (N-vinylpyrrolidone).

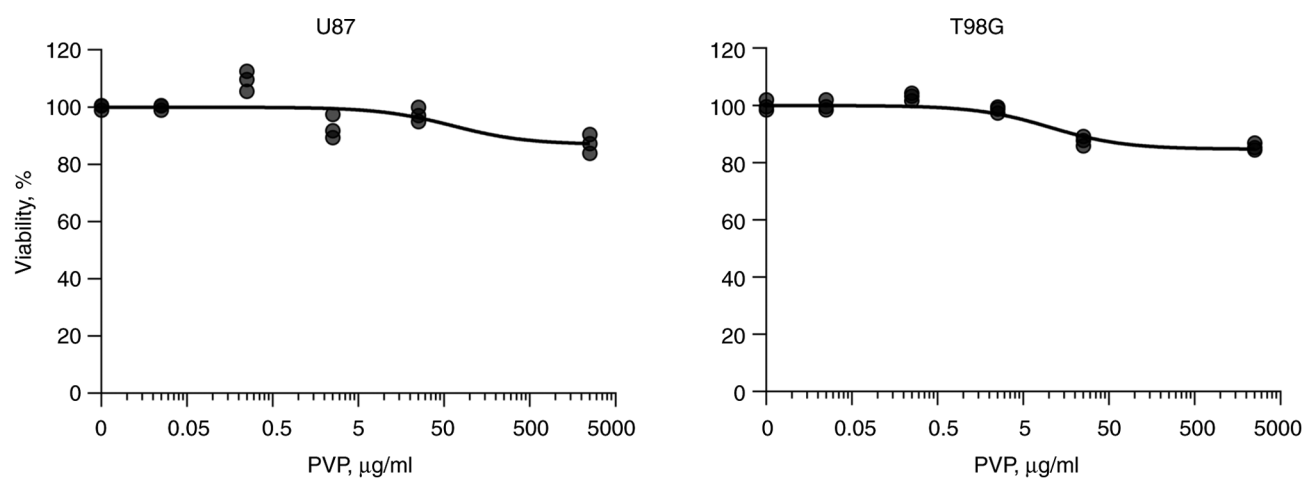

Figure S3. Cytotoxicity of free prothionamide in monolayer U87 human glioblastoma cell line evaluated by MTT test after 72 h of incubation.

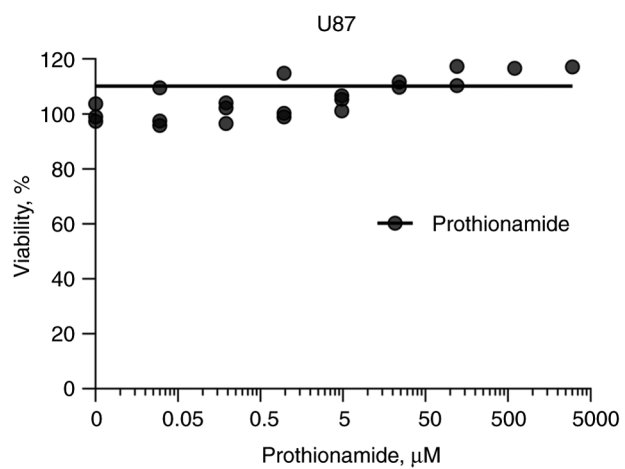

Supplement: Supplementary file 1 [file downloadSupplementary]
